# Supplementary material for: Disulfide exchange assisted self-healing epoxy/PDMS/graphene oxide nanocomposites
Source: Royal Society of Chemistry journal article supplement (doi:10.1039/d0na00282h), 2020-01-01
Supplement: d0na00282h1.pdf [file d0na00282h1.pdf]

## Disulfide Exchange Assisted Self-healing Epoxy/PDMS/Graphene Oxide Nanocomposites

Balaji Krishnakumar,<sup>1</sup> Manjeet Singh,<sup>1</sup> Vijay Parthasarthy,<sup>1</sup> Chanwook Park,<sup>2</sup> Nanda Gopal Sahoo,<sup>3</sup> Gun  
Jin Yun,<sup>\* 2</sup> Sravendra Rana<sup>\*1</sup>

<sup>1</sup>University of Petroleum & Energy Studies (UPES), School of Engineering, Energy Acres, Bidholi, Dehradun,  
248007, India,

<sup>2</sup>Institute of Advanced Aerospace Technology, Seoul National University, Gwanak-gu Gwanak-ro 1, Seoul  
08826, South Korea

<sup>3</sup>Nanoscience and Nanotechnology Centre, Department of Chemistry, D.B.S. Campus, Kumaun University,  
Nainital, Uttarakhand, 263001, India

<sup>\*</sup>Correspondence: Email: [srana@ddn.upes.ac.in](mailto:srana@ddn.upes.ac.in) (S. Rana), [gunjin.yun@snu.ac.kr](mailto:gunjin.yun@snu.ac.kr) (G.J. Yun)

### Preparation of graphene oxide:

Hummers method was followed to synthesis graphene oxide(GO) sheets. The sulfuric acid (23ml) was added in the mixture of graphite flakes (1g) and sodium nitrate (NaNO<sub>3</sub>) (0.5g) at 0°C (ice bath). After 10 -15 mins, the Potassium permanganate (KMnO<sub>4</sub>) (3mg) was slowly added in the reaction mixture at 20°C, then it was allowed at 35°C for 7h. Furthermore, Potassium permanganate (KmnO<sub>4</sub>) (3g) was added slowly in the reaction and it was stirred at 35°C for 10-12h. Then after, reaction mixture was cooled at room temperature and then cold water (133ml) was added with 30% hydrogen peroxide(H<sub>2</sub>O<sub>2</sub>) (3ml). Finally, after certain time precipitated layer was washed with ethanol, HCl and water 3 times respectively by centrifuge.

### Calculation for epoxy and amine hardener ratio:

Parts by weight of amine to be used with 100 parts by weight of BADGE resin (phr) =

$$\left( \frac{\text{amine hardener molecular weight / number of hydrogens per molecule}}{\text{BADGE equivalent weight}} \right) * 100\%$$

The equivalent weight of BADGE resin is 176 g/mole (mentioned by manufacture) and an active hydrogen in 2-AFD is FOUR.

$$\Rightarrow \left( \frac{248/4}{176} \right) * 100 \% = 35.6\%$$

So, 35.6 g of AFD is needed to cure the 100 g of BADGE resin.

**Table S1.** Different (a) Epoxy composite and (b) Epoxy/PDMS/GO nanocomposite

(a) Epoxy/PDMS composites

| Sample Code | Epoxy (mg) | DG-PDMS          |                         |
|-------------|------------|------------------|-------------------------|
|             |            | PDMS Weight (mg) | Weight percentage (wt%) |
| EP-pristine | 500        | 0                | 0                       |
| EP-1        | 500        | 5                | 1                       |
| EP-2        | 500        | 10               | 2                       |
| EP-3        | 500        | 15               | 3                       |
| EP-5        | 500        | 25               | 5                       |

**(b) Epoxy/PDMS/GO Nanocomposites**

| Epoxy-2-<br>GO (EP-<br>2-y) | Epoxy (mg) | DG-PDMS (mg)   |                               | Graphene oxide<br>(mg) |                               | Graphene oxide<br>dispersed solution<br>(mL) |
|-----------------------------|------------|----------------|-------------------------------|------------------------|-------------------------------|----------------------------------------------|
|                             |            | Weight<br>(mg) | Weight<br>percentage<br>(wt%) | Weight<br>(mg)         | Weight<br>percentage<br>(wt%) |                                              |
| EP-2-0.1                    | 600        | 12             | 2                             | 0.6                    | 0.1                           | 0.04                                         |
| EP-2-0.2                    | 600        | 12             | 2                             | 1.2                    | 0.2                           | 0.08                                         |
| EP-2-0.5                    | 600        | 12             | 2                             | 3                      | 0.5                           | 0.20                                         |
| EP-2- 1                     | 600        | 12             | 2                             | 6                      | 1                             | 0.40                                         |
| EP-2- 2                     | 600        | 12             | 2                             | 12                     | 2                             | 0.80                                         |

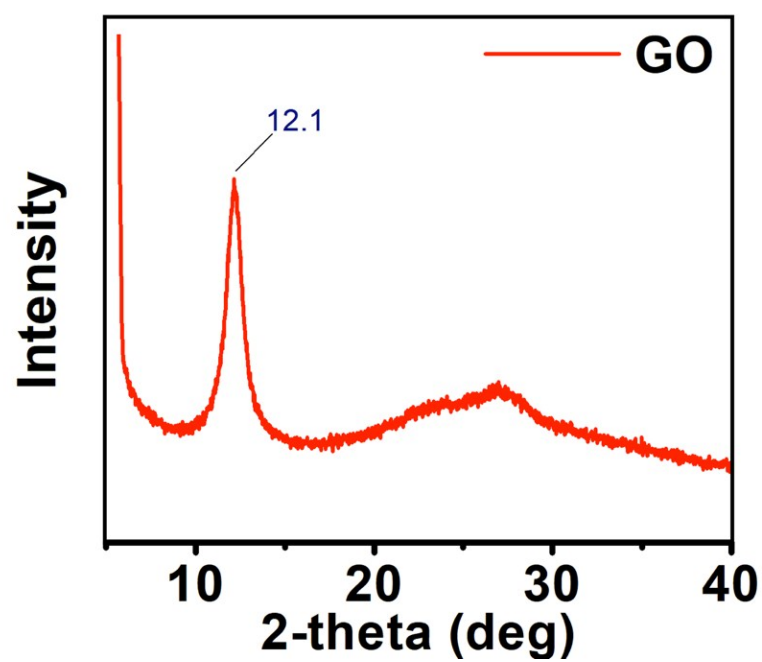

XRD

**Figure S1.** X-Ray Diffraction spectroscopy analysis for graphene oxide

FTIR

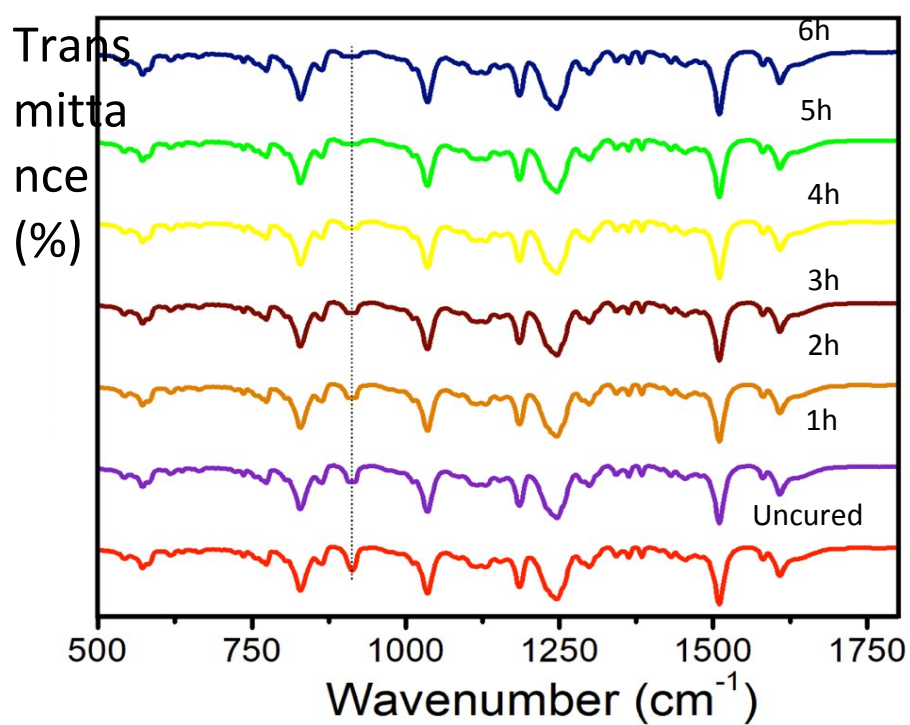

**Figure S2.** FTIR results for EP-pristine curing with respect to time

**THF swelling test:**

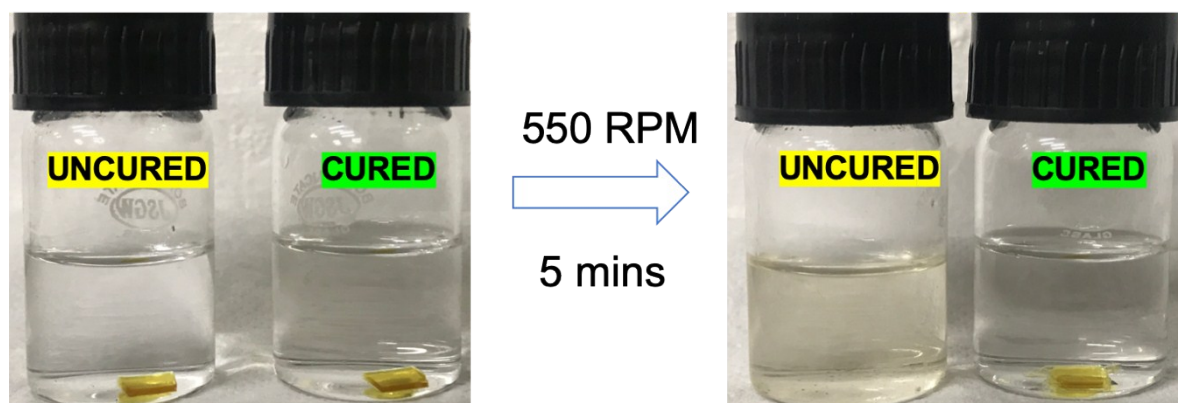

(i)

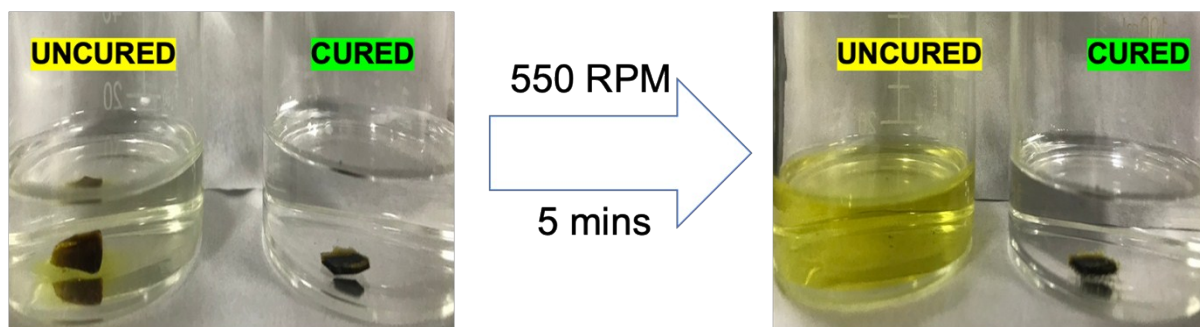

(ii)

**Figure S3.** THF swelling test for (i) EP-p (ii) EP-2-0.5

### Contact angle measurements

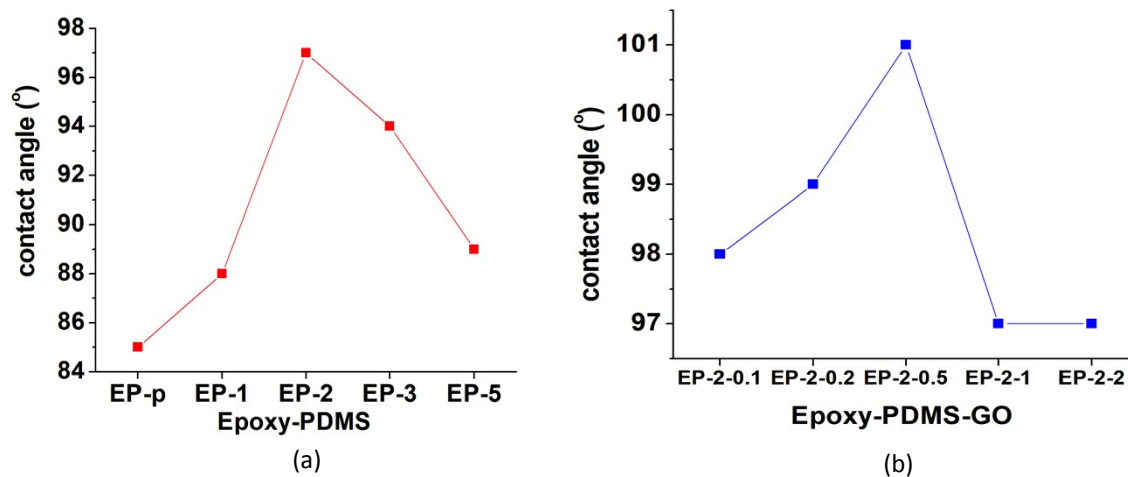

**Figure S4.** Contact angle measurements of different samples.

## Glass transition temperature:

The different nano fillers contained epoxy vitrimer glass transition was analyzed through TA-Q400 em dimension change experiments.

### a) EP-pristine

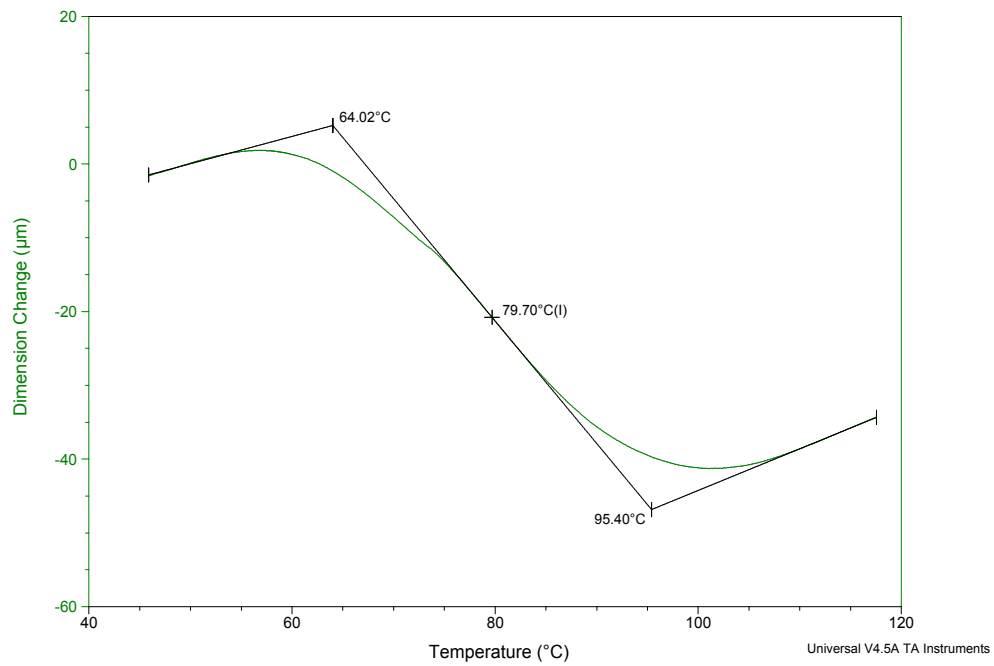

### b) EP-1

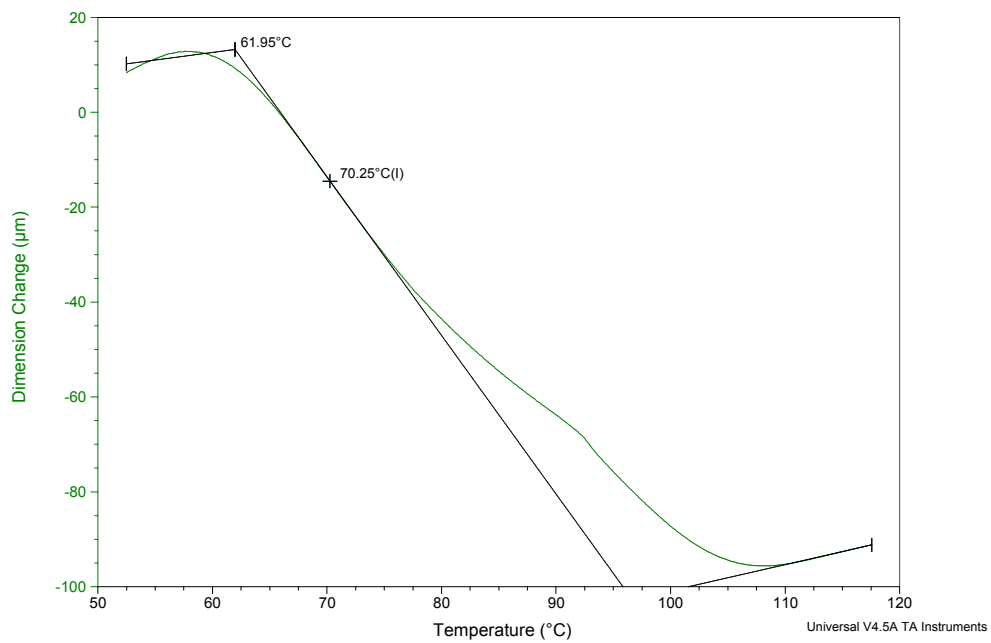

c) EP- 2

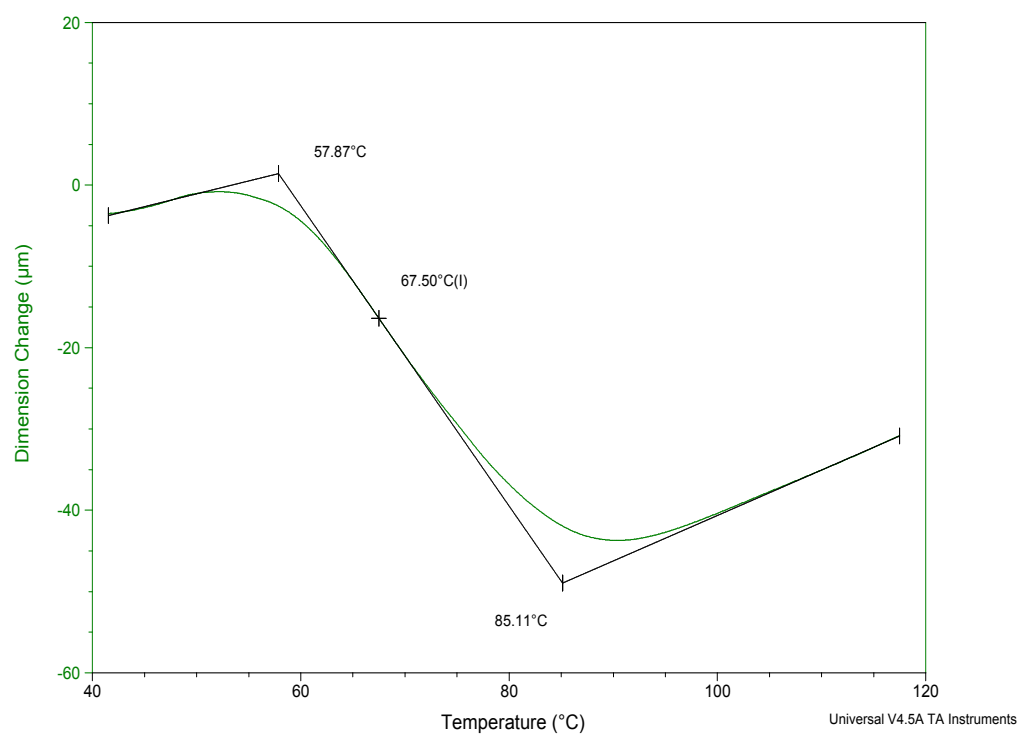

d) EP-3

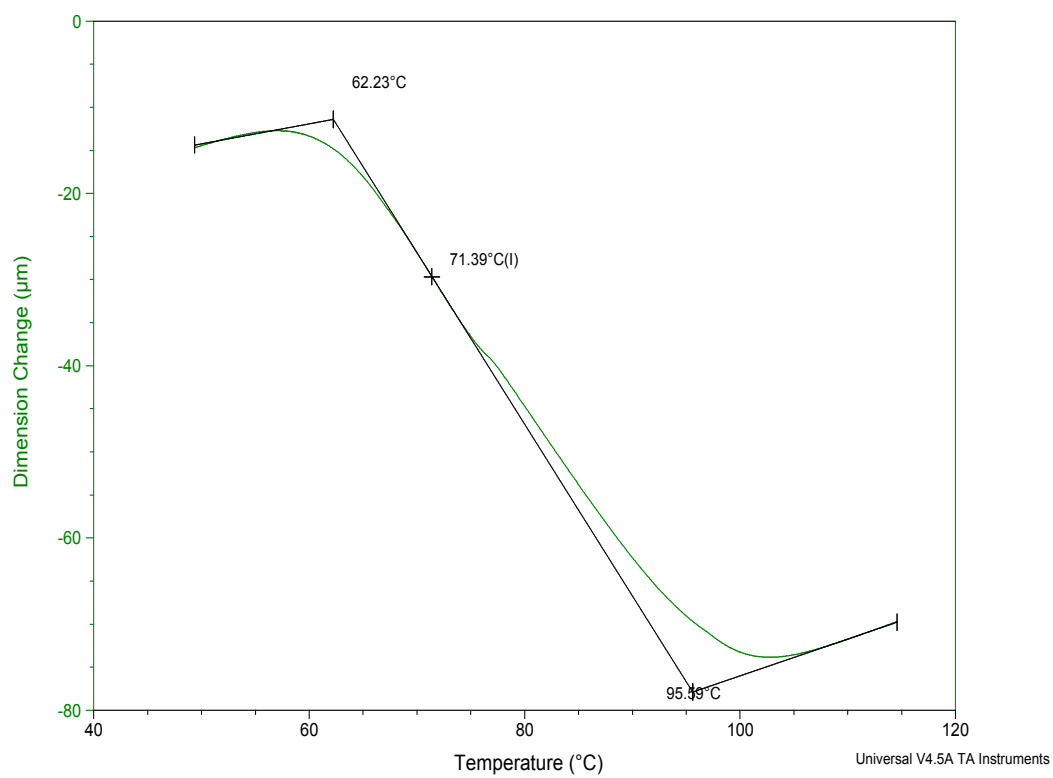



e) EP- 5

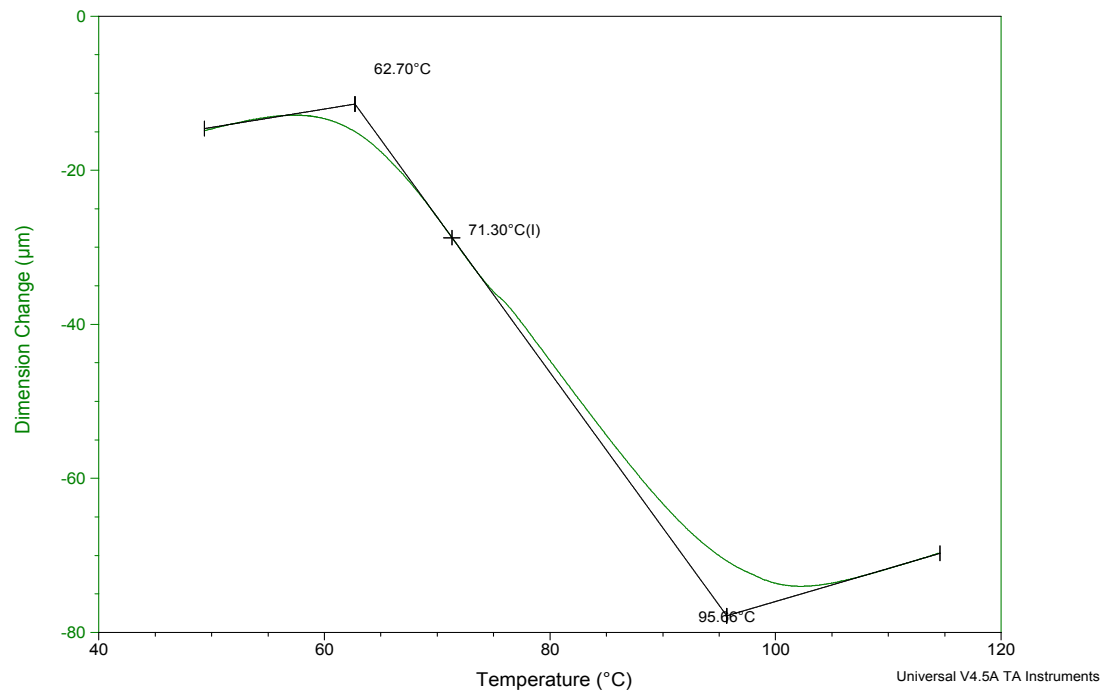

f) EP-2-0.1

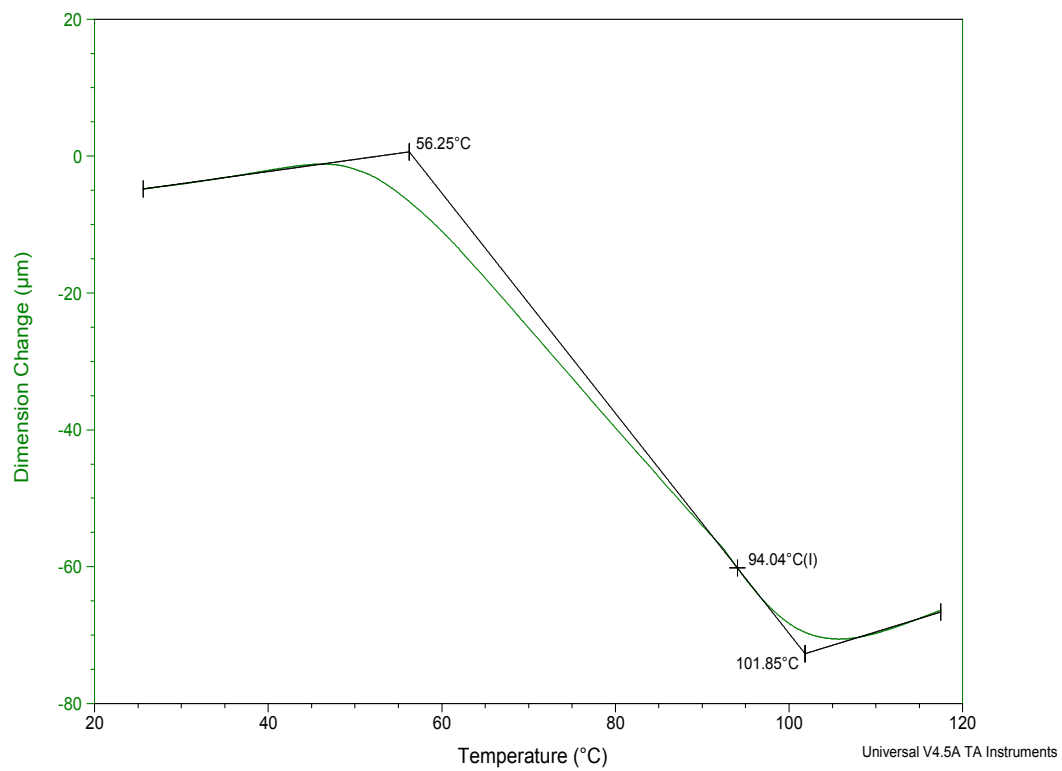

g) EP-2-0.2

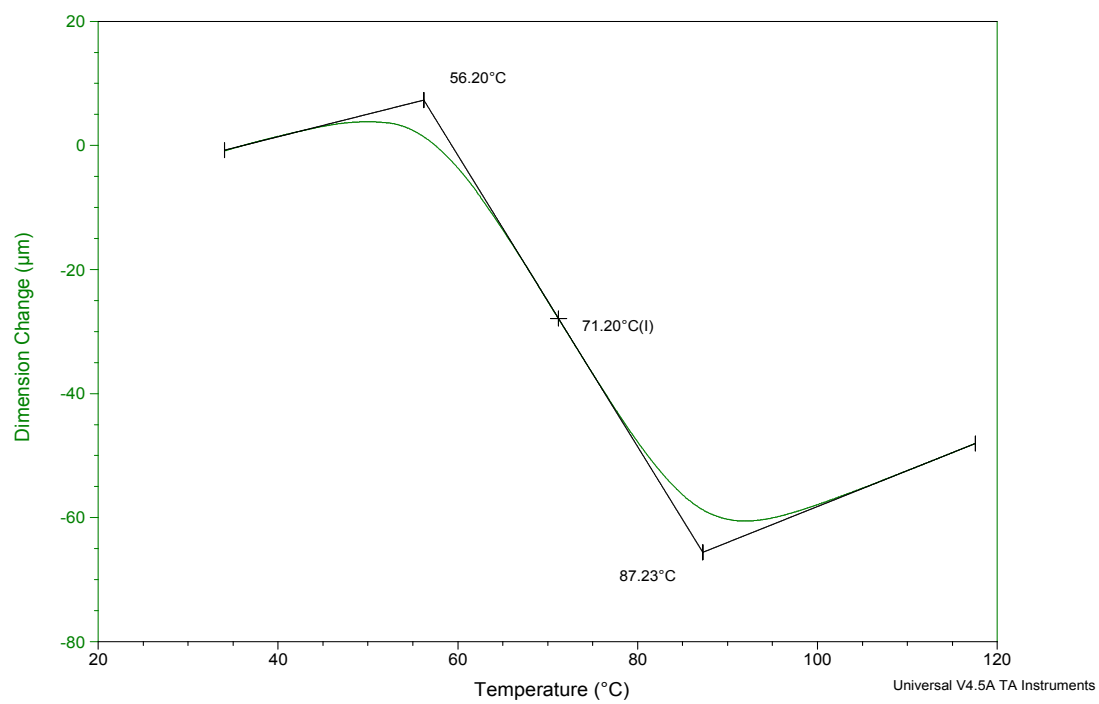

h) EP-2-0.5

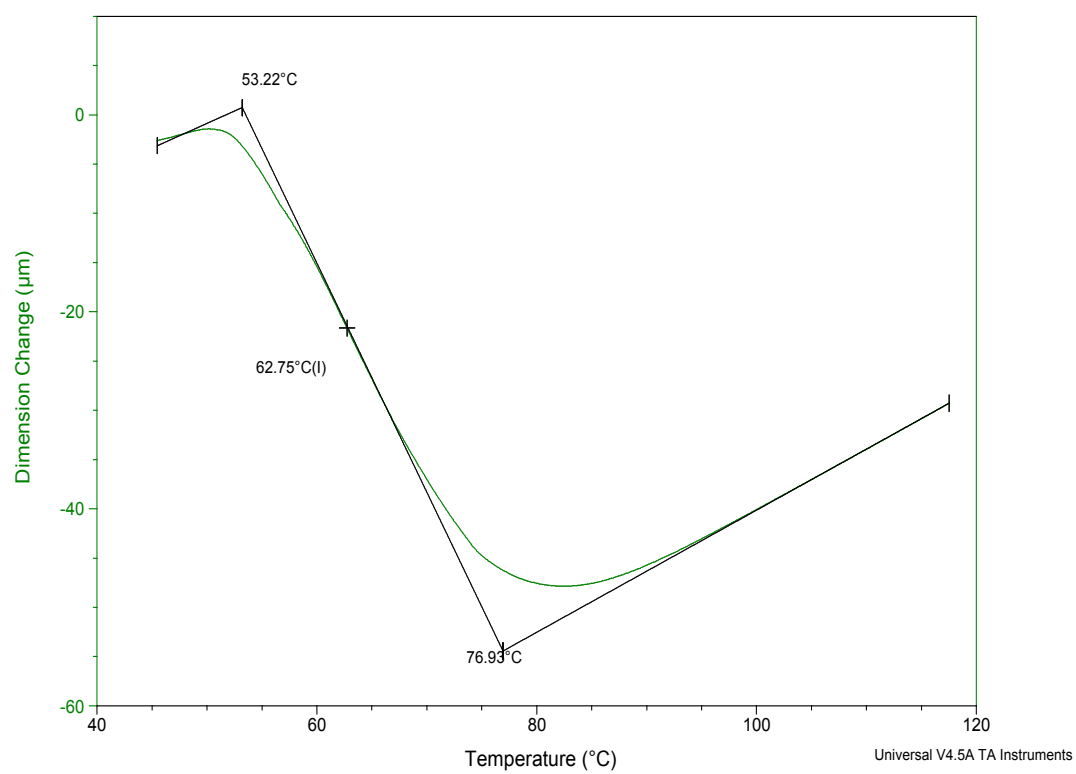

i) EP-2-1

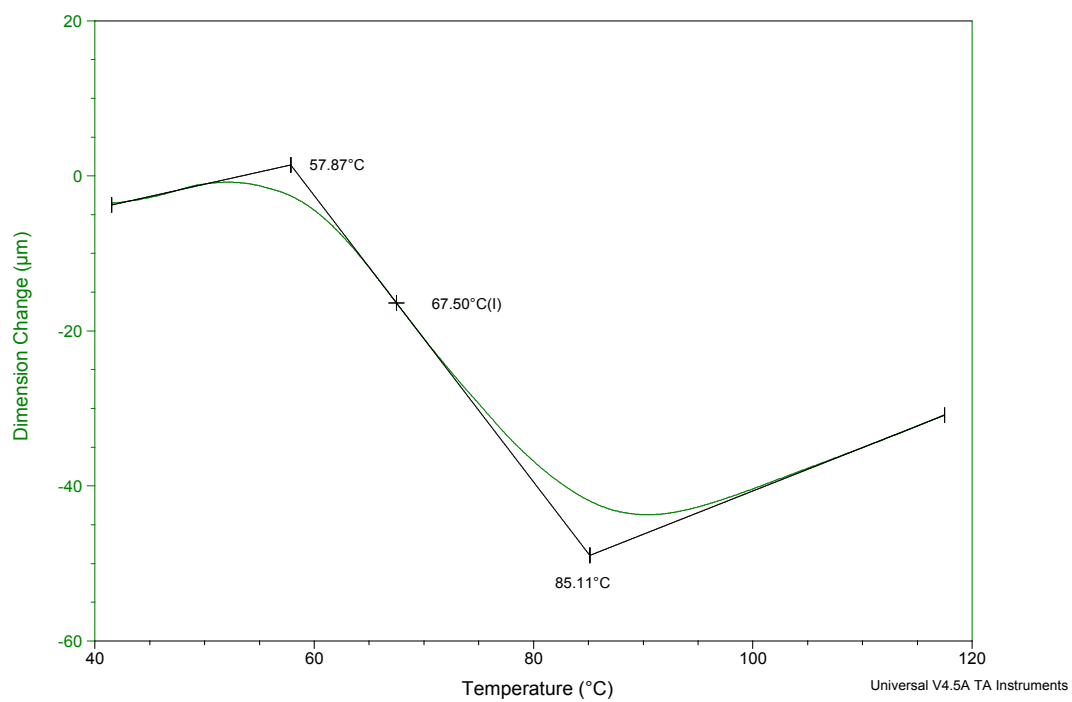

j) EP-2-2

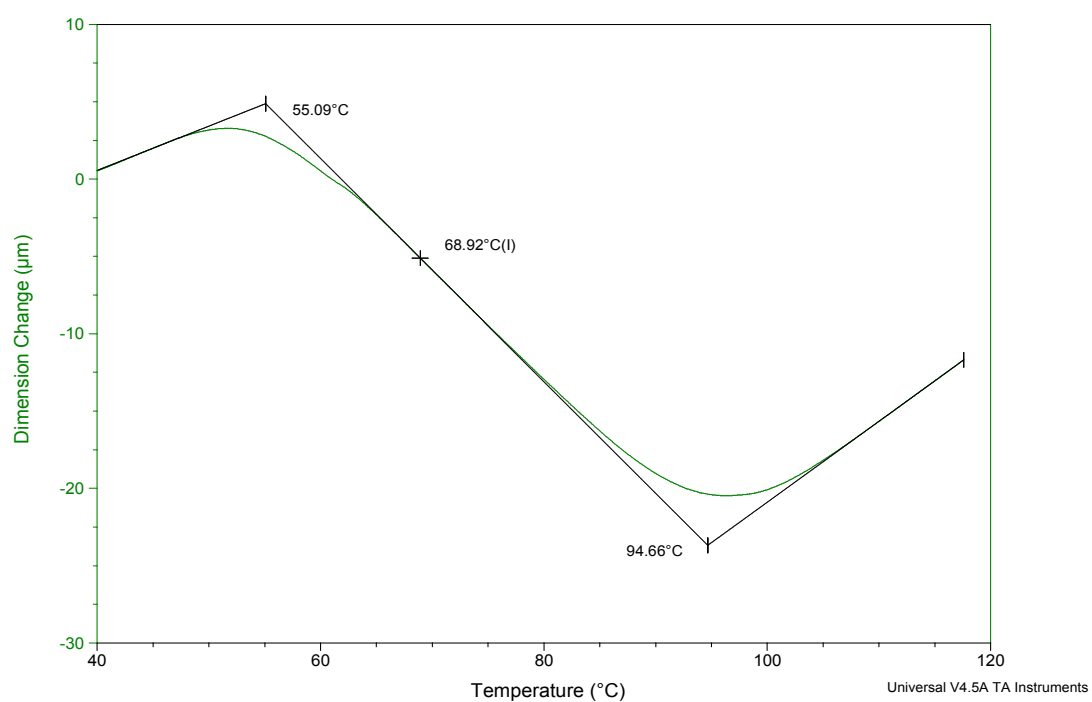

**Figure S5.** Glass transition temperature through TA-Q400em dimensional change experiments

**Calculations for stress relaxation derived activation energy**

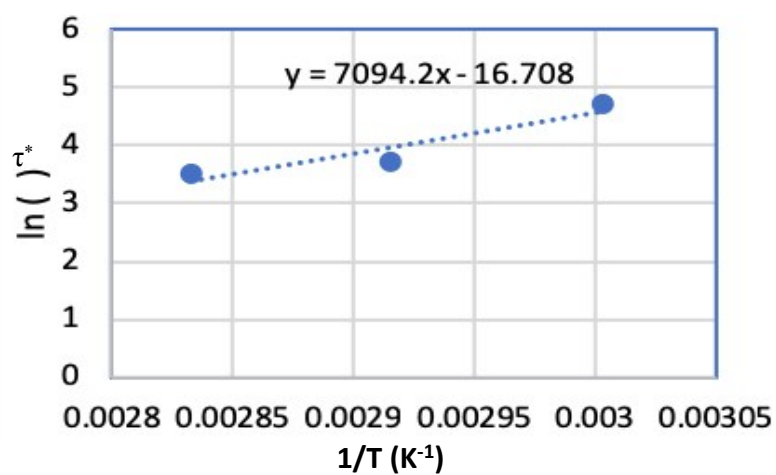

i) EP-p :

Equation obtained from Arrhenius law:  $y = y = 7094.2x - 16.708$

Which corresponds to:  $\ln(\tau^*) = 7094.2 * 1/T - 16.708$

The Arrhenius law related to the activation energy is:

$$\tau^* = \tau_0 \exp (E_a/RT) \quad (S1)$$

Identifying this to the experimental equation:  $E_a/R = 7094.2$

**$E_a = 7094.2 * 8.314 = 59 \text{ kJ/mol}$**  Therefore:  $\ln(\tau^*) = \ln(\tau_0) + E_a/RT$

### **Calculation for $T_v$ :**

To calculate  $T_v$  , we used Maxwell equation (S2),

$$\eta = G. \tau^* \quad (S2)$$

G- Shear viscosity modulus;

Relation between shear modulus and tensile modulus,

$$G = E' / 2(1+\nu) \quad (S3)$$

Generally,  $\nu$ - Poisson's ratio is 0.5 for rubbery materials. From the storage modulus (Figure 5a), average tensile modulus was observed at 80°C- 120°C temperature range and the obtained value 1504 MPa denoted the rubbery plateau modulus of vitrimer network.

So ,  $G=1504/3= 501\text{MPa}$  (or)  $501*10^6 \text{ Pa}$

To find  $T_v$ , viscosity value arbitrary has been taken as:  $\eta=10^{12} \text{ Pa.s}$ .

$$\tau^*= 10^{12}/(501*10^6) = 1996 \text{ s.}$$

$$\ln(\tau^*) = \ln(1996) = 7.59$$

Equation obtained from Arrhenius law:  $\ln(\tau^*) = 7094.2x - 16.708$

$$x=1/T = (\ln(\tau^*)+16.708)/7094.2 = 0.003426$$

$$\text{So, } T = 1/0.003426$$

$$T_v = 292 \text{ K (or) } 19^\circ\text{C}.$$

ii) EP-2 :

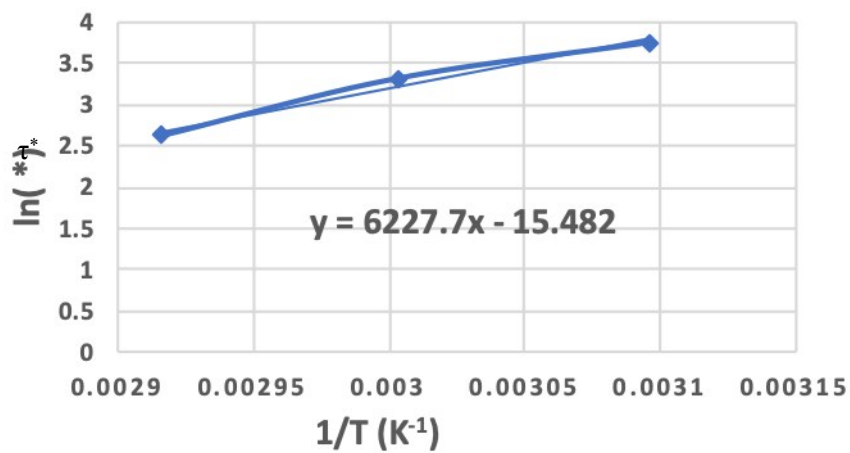

Equation obtained from Arrhenius law:  $y = y = 6227.7X - 15.482$

Which corresponds to:  $\ln(\tau^*) = 6227.7 * 1/T - 15.482$

The Arrhenius law related to the activation energy is:

$$\tau^* = \tau_0 \exp(E_a/RT) \quad (S1)$$

$$\text{Therefore: } \ln(\tau^*) = \ln(\tau_0) + E_a/RT$$

Identifying this to the experimental equation:  $E_a/R = 6227.7$

$$E_a = 6227.7 * 8.314 = 51.7 \text{ kJ/mol}$$

**Calculation for  $T_v$ :**

To calculate  $T_v$ , we used Maxwell equation (S2),

$$\eta = G \cdot \tau^* \quad (S2)$$

G- Shear viscosity modulus;

Relation between shear modulus and tensile modulus,

$$G = E' / 2(1+\nu) \quad (S3)$$

Generally,  $\nu$ - Poisson's ratio is 0.5 for rubbery materials. From the storage modulus (Figure 5a), average tensile modulus was observed at 70°C- 120°C temperature range and the obtained value 1795 MPa denoted the rubbery plateau modulus of vitrimer network.

$$\text{So, } G = 1795/3 = 598.3 \text{ MPa (or) } 598.3 \times 10^6 \text{ Pa}$$

To find  $T_v$ , viscosity value arbitrary has been taken as:  $\eta = 10^{12} \text{ Pa.s}$ .

$$\tau^* = 10^{12} / (598.3 \times 10^6) = 1671.42 \text{ s.}$$

$$\ln(\tau^*) = \ln(1671.42) = 7.42$$

Equation obtained from Arrhenius law:  $\ln(\tau^*) = 6227.7X - 15.482$

$$x = 1/T = (\ln(\tau^*) + 15.482) / 6227.7 = 0.003677$$

$$\text{So, } T = 1/0.003677$$

$$T_v = 272 \text{ K (or) } -1^\circ\text{C}.$$

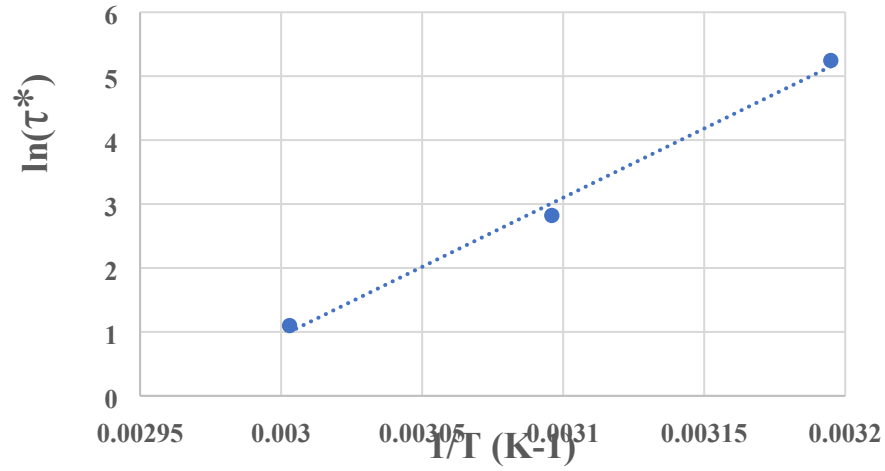

**iii) EP-2-0.5 :**

Equation obtained from Arrhenius law:  $y = y = 21639x - 63.982$

Which corresponds to:  $\ln(\tau^*) = 21639 * 1/T - 63.982$

The Arrhenius law related to the activation energy is:

$$\tau^* = \tau_0 \exp(E_a/RT) \quad (S1)$$

$$\text{Therefore: } \ln(\tau^*) = \ln(\tau_0) + E_a/RT$$

Identifying this to the experimental equation:  $E_a/R = 21639$

$$E_a = 21639 * 8.314 = 179.9 \text{ kJ/mol}$$

**Calculation for  $T_v$ :**

To calculate  $T_v$ , we used Maxwell equation (S2),

$$\eta = G \cdot \tau^* \quad (S2)$$

G- Shear viscosity modulus;



Relation between shear modulus and tensile modulus,

$$G = E' / 2(1+\nu) \quad (S3)$$

Generally,  $\nu$ - Poisson's ratio is 0.5 for rubbery materials. From the storage modulus (Figure 5a), average tensile modulus was observed at 60°C- 120°C temperature range and the obtained value 2452 MPa denoted the rubbery plateau modulus of vitrimer network.

$$\text{So, } G = 2452/3 = 817.3 \text{ MPa (or) } 817.3 \times 10^6 \text{ Pa}$$

To find  $T_v$ , viscosity value arbitrary has been taken as:  $\eta = 10^{12} \text{ Pa.s}$ .

$$\tau^* = 10^{12} / (817.3 \times 10^6) = 1223.5 \text{ s.}$$

$$\ln(\tau^*) = \ln(1223.5) = 7.1$$

Equation obtained from Arrhenius law:  $\ln(\tau^*) = 21639x - 63.982$

$$x = 1/T = (\ln(\tau^*) + 63.982) / 21639 = 0.00328$$

$$\text{So, } T = 1/0.00328$$

$$T_v = 304 \text{ K (or) } 31^\circ\text{C}.$$

**Supporting videos:**

1. EP-p self-healing
